# Supplementary material
Source: HighWire-hosted journal article supplement (https://jech.bmj.com/content/70/9/874)
Supplement: inline-supplementary-material-1 [file inline-supplementary-material-1.pdf]

**Supplemental Table 1. Description of Unemployment and Foreclosure Rates in California 2008-2012 by County<sup>1</sup>**

| County Number | Sample Size | Unemployment |           |                    | Foreclosure |          |                    |
|---------------|-------------|--------------|-----------|--------------------|-------------|----------|--------------------|
|               |             | Mean Rate    | Range     | Standard Deviation | Mean Rate   | Range    | Standard Deviation |
| 1             | 58,705      | 9.7          | 6.2-11.3  | 1.8                | 5.6         | 3.3-6.5  | 1.2                |
| 2             | 23          | 14.1         | 10.3-15.4 | 1.6                | 10.5        | 1.7-20.2 | 5.9                |
| 3             | 1,490       | 11.6         | 7.6-13.3  | 2.0                | 6.6         | 4.4-8.56 | 1.6                |
| 4             | 9,052       | 12.2         | 8.4-13.9  | 2.0                | 4.5         | 3.7-5.6  | 0.8                |
| 5             | 1,808       | 13.3         | 8.6-15.3  | 2.3                | 7.8         | 5.9-10.3 | 1.9                |
| 6             | 1,244       | 18.9         | 13.8-20.5 | 2.2                | 9.4         | 4.9-13.5 | 3.7                |
| 7             | 52,221      | 9.6          | 6.2-11.1  | 1.7                | 6.6         | 3.8-8.7  | 1.8                |
| 8             | 1,182       | 12.1         | 8.8-13.4  | 1.7                | 3.4         | 1.6-4.3  | 1.0                |
| 9             | 8,949       | 10.7         | 6.9-12.5  | 2.0                | 5.6         | 4.0-6.9  | 1.2                |
| 10            | 49,879      | 15.0         | 10.5-16.9 | 2.3                | 7.4         | 4.4-9.4  | 1.8                |
| 11            | 1,293       | 14.3         | 10.4-15.9 | 2.0                | 5.4         | 4.1-6.7  | 1.1                |
| 12            | 3,788       | 10.4         | 7.2-11.4  | 1.5                | 2.4         | 1.2-2.9  | 0.6                |
| 13            | 10,762      | 27.8         | 22.4-29.9 | 2.7                | 9.5         | 6.1-12.3 | 2.6                |
| 14            | 585         | 9.2          | 6.6-10    | 1.1                | 2.5         | 1.4-3.0  | 0.5                |
| 15            | 44,069      | 14.0         | 9.8-15.9  | 1.8                | 9.2         | 5.3-12.6 | 2.9                |
| 16            | 8,457       | 14.8         | 10.5-16.5 | 2.2                | 6.4         | 4.7-7.8  | 1.2                |
| 17            | 2,439       | 15.3         | 10.6-17.7 | 2.4                | 11.3        | 8.6-14.7 | 2.4                |
| 18            | 839         | 12.6         | 9.5-14    | 1.5                | 7.5         | 2.2-10.0 | 2.6                |
| 19            | 490,187     | 11.1         | 7.5-12.6  | 1.8                | 6.3         | 4.2-8.2  | 1.3                |
| 20            | 8,775       | 13.7         | 9.4-15.6  | 2.1                | 10.3        | 5.6-13.3 | 2.9                |
| 21            | 8,022       | 6.9          | 4.7-8     | 1.2                | 2.3         | 1.81-2.8 | 0.4                |
| 22            | 670         | 10.7         | 7.5-11.9  | 1.5                | 4.6         | 2.3-5.9  | 1.2                |
| 23            | 3,539       | 10.0         | 6.9-11.3  | 1.5                | 4.5         | 2.6-5.1  | 0.9                |
| 24            | 14,591      | 17.2         | 12.5-18.8 | 1.9                | 12.9        | 5.2-23.2 | 6.0                |
| 25            | 382         | 13.2         | 9.6-15    | 1.8                | 1.7         | 0.4-2.9  | 0.8                |
| 26            | 397         | 9.2          | 5.9-10.5  | 1.7                | 13.6        | 3.8-18.3 | 5.3                |
| 27            | 18,629      | 11.5         | 8.4-12.7  | 1.5                | 7.5         | 3.9-11.5 | 2.6                |
| 28            | 6,302       | 8.2          | 5.1-9.7   | 1.6                | 4.7         | 3.0-5.9  | 1.1                |
| 29            | 3,235       | 9.8          | 6.5-11.4  | 1.7                | 4.7         | 3.0-5.9  | 1.1                |
| 30            | 138,857     | 8.1          | 5.3-9.5   | 1.5                | 4.3         | 2.8-5.5  | 0.9                |
| 31            | 20,275      | 9.9          | 6.4-11.5  | 1.7                | 5.9         | 3.7-7.7  | 1.6                |
| 32            | 645         | 14.8         | 10.5-16.7 | 2.2                | 7.4         | 2.9-9.6  | 2.5                |
| 33            | 133,280     | 12.7         | 8.5-14.5  | 2.0                | 10.4        | 6.5-13.7 | 2.8                |
| 34            | 68,643      | 11.0         | 7.2-12.7  | 1.9                | 8.4         | 4.8-10.7 | 2.2                |
| 35            | 2,687       | 15.3         | 9.6-17.2  | 1.5                | 7.2         | 3.8-10.7 | 2.4                |

|    |         |      |           |     |      |          |     |
|----|---------|------|-----------|-----|------|----------|-----|
| 36 | 130,158 | 12.3 | 8-14.2    | 2.2 | 10.6 | 6.4-13.8 | 2.9 |
| 37 | 141,287 | 9.1  | 6-10.5    | 1.6 | 5.8  | 3.1-7.5  | 1.6 |
| 38 | 15,122  | 8.0  | 5.2-9.6   | 1.6 | 2.3  | 1.5-2.8  | 0.5 |
| 39 | 39,833  | 15.2 | 10.4-17.3 | 2.4 | 11.2 | 5.8-16.8 | 3.8 |
| 40 | 11,025  | 8.6  | 5.7-9.9   | 1.5 | 4.2  | 3.0-5.2  | 0.9 |
| 41 | 22,510  | 7.5  | 4.9-8.8   | 1.4 | 2.7  | 1.8-3.2  | 0.5 |
| 42 | 13,886  | 8.2  | 5.4-9.4   | 1.3 | 4.8  | 3.7-5.5  | 0.6 |
| 43 | 76,733  | 9.4  | 6-11      | 1.8 | 3.5  | 1.9-4.7  | 1.0 |
| 44 | 10,373  | 11.1 | 7.3-12.6  | 1.9 | 4.2  | 3.0-4.80 | 0.7 |
| 45 | 6,920   | 14.1 | 10-15.8   | 1.9 | 5.5  | 4.1-6.6  | 0.9 |
| 46 | 123     | 14.1 | 10.5-15.4 | 1.8 | 6.2  | 3.8-8.8  | 1.8 |
| 47 | 1,033   | 14.8 | 10.1-16.6 | 2.3 | 4.2  | 2.4-5.3  | 1.0 |
| 48 | 18,555  | 10.3 | 6.8-12    | 1.9 | 8.6  | 4.6-11.0 | 2.3 |
| 49 | 16,180  | 9.0  | 5.7-10.5  | 1.7 | 4.6  | 3.0-5.4  | 0.9 |
| 50 | 33,928  | 15.4 | 11-17.3   | 2.2 | 10.8 | 5.6-15.7 | 3.6 |
| 51 | 5,569   | 17.3 | 12.3-19.5 | 2.5 | 6.5  | 4.0-8.1  | 1.4 |
| 52 | 2,893   | 13.8 | 9.2-15.6  | 2.1 | 5.7  | 3.7-6.8  | 1.1 |
| 53 | 267     | 16.8 | 12.7-18.4 | 1.7 | 1.8  | 0.5-3.1  | 0.9 |
| 54 | 29,887  | 15.3 | 10.8-16.9 | 2.1 | 6.8  | 4.5-8.2  | 1.4 |
| 55 | 1,343   | 11.8 | 8-13.8    | 2.1 | 5.2  | 3.2-6.5  | 1.2 |
| 56 | 44,397  | 9.4  | 6.3-10.8  | 1.6 | 4.5  | 3.3-5.3  | 0.7 |
| 57 | 9,434   | 11.2 | 7.4-12.7  | 1.9 | 5.1  | 3.2-6.1  | 1.1 |
| 58 | 4,222   | 16.9 | 11.8-19.2 | 2.6 | 10.5 | 6.5-12.6 | 2.4 |

<sup>1</sup> Descriptive statistics for the 1,741,712 children included in the primary models. The mean, range and standard deviation reflect all of the observations (3,786,708) over the time period (2008-2012).

**Supplemental Table 2. Individual Fixed-Effects Regression for the Relationship Between Unemployment Rate, Foreclosure Rate and Weight Status<sup>a</sup>**

|                   | N = 1,741,712                        |                                               |                                               |
|-------------------|--------------------------------------|-----------------------------------------------|-----------------------------------------------|
|                   | BMI z-score <sup>b</sup>             | Underweight <sup>b,c</sup>                    | Obesity <sup>b,c</sup>                        |
|                   | $\beta$<br>(95% Confidence Interval) | Percentage Point<br>(95% Confidence Interval) | Percentage Point<br>(95% Confidence Interval) |
| Unemployment Rate | 0.084 (0.076, 0.091)***              | -1.3 (-1.4, -1.1)***                          | 0.94 (0.90, 0.98)***                          |
| Foreclosure Rate  | -0.0078 (-0.018, 0.0019)             | 0.030 (-0.13, 0.19)                           | -0.22 (-0.34, -0.11)***                       |

<sup>a</sup> Estimated using ordinary least squares regression, with individual and county fixed-effects. Models include both county-level unemployment and foreclosure and an age by race/ethnicity interaction to control for race/ethnicity-specific time trends. Beta coefficients for underweight and obesity were multiplied by 100 and can be interpreted as a percentage point change.

<sup>b</sup> p-value for age by race/ethnicity = < 0.001.

<sup>c</sup> Underweight is defined as BMI < 5th percentile and obesity is defined as BMI ≥95th percentile using the 2000 CDC/NCHS growth charts.

\*p < 0.05 \*\*p < 0.01 \*\*\*p < 0.001

**Supplemental Table 3. Individual Fixed-Effects Regression for the Relationship Between Log-transformed Unemployment and Foreclosure Rates and Weight Status<sup>a</sup>**

| N = 1,741,712                     |                            |                            |                                   |                            |
|-----------------------------------|----------------------------|----------------------------|-----------------------------------|----------------------------|
|                                   | BMI z-score <sup>b</sup>   | Underweight <sup>b,c</sup> | Overweight/Obesity <sup>b,c</sup> | Obesity <sup>b,c</sup>     |
|                                   | $\beta$                    | Percentage Point           | Percentage Point                  | Percentage Point           |
|                                   | (95% Confidence Interval)  | (95% Confidence Interval)  | (95% Confidence Interval)         | (95% Confidence Interval)  |
| Log-transformed Unemployment Rate | 0.82<br>(0.76, 0.88)***    | -1.2<br>(-1.4, -1.1)***    | 1.4<br>(1.3, 1.5)***              | 0.91<br>(0.83, 0.99)***    |
| Log-transformed Foreclosure Rate  | -0.20<br>(-0.31, -0.10)*** | 0.25<br>(0.093, 0.40)**    | -0.46<br>(-0.66, -0.25)***        | -0.36<br>(-0.50, -0.21)*** |

<sup>a</sup> Estimated using ordinary least squares regression, with individual and county fixed-effects. Models include both county-level unemployment and foreclosure and an age by race/ethnicity interaction to control for race/ethnicity-specific time trends. Beta coefficients for underweight, overweight/obesity, and obesity were multiplied by 10 and can be interpreted as a percentage point change.

<sup>b</sup> p-value for age by race/ethnicity = < 0.001.

<sup>c</sup> Underweight is defined as BMI < 5th percentile; overweight/obesity is defined as BMI ≥85th percentile; and obesity is defined as BMI ≥95th percentile using the 2000 CDC/NCHS growth charts.

\*p < 0.05 \*\*p < 0.01 \*\*\*p < 0.001

**Supplemental Table 4. Individual Fixed-Effects Regression for the Relationship Between Unemployment Rate, Foreclosure Rate, and Weight Status when Excluding Los Angeles County<sup>a</sup>**

| N = 1,254,561     |                                      |                                               |                                               |                                               |
|-------------------|--------------------------------------|-----------------------------------------------|-----------------------------------------------|-----------------------------------------------|
|                   | BMI z-score <sup>b</sup>             | Underweight <sup>b,c</sup>                    | Overweight/Obesity <sup>b,c</sup>             | Obesity <sup>b,c</sup>                        |
|                   | $\beta$<br>(95% Confidence Interval) | Percentage Point<br>(95% Confidence Interval) | Percentage Point<br>(95% Confidence Interval) | Percentage Point<br>(95% Confidence Interval) |
| Unemployment Rate | 0.087<br>(0.079, 0.095)***           | -1.3<br>(-1.5, -1.1)***                       | 1.5<br>(1.4, 1.6)***                          | 0.94<br>(0.89, 0.99)***                       |
| Foreclosure Rate  | -0.0036<br>(-0.012, 0.0047)          | -0.033<br>(-0.18, 0.11)                       | -0.21<br>(-0.38, -0.047)*                     | -0.17<br>(-0.27, -0.072)**                    |

<sup>a</sup> Estimated using ordinary least squares regression, with individual and county fixed-effects. Models include both county-level unemployment and foreclosure and an age by race/ethnicity interaction to control for race/ethnicity-specific time trends. Beta coefficients for underweight, overweight/obesity, and obesity were multiplied by 100 and can be interpreted as a percentage point change.

<sup>b</sup> p-value for age by race/ethnicity = < 0.001.

<sup>c</sup> Underweight is defined as BMI < 5th percentile; overweight/obesity is defined as BMI ≥85th percentile; and obesity is defined as BMI ≥95th percentile using the 2000 CDC/NCHS growth charts.

\*p < 0.05 \*\*p < 0.01 \*\*\*p < 0.001

**Supplemental Table 5. Individual Fixed-Effects Regression for the Relationship Between Unemployment Rate, Foreclosure Rate and Weight Status Among Children not Moving Counties<sup>a</sup>**

|                   | N = 1,670,397              |                            |                                   |                           |
|-------------------|----------------------------|----------------------------|-----------------------------------|---------------------------|
|                   | BMI z-score <sup>b</sup>   | Underweight <sup>b,c</sup> | Overweight/Obesity <sup>b,c</sup> | Obesity <sup>b,c</sup>    |
|                   | $\beta$                    | Percentage Point           | Percentage Point                  | Percentage Point          |
|                   | (95% Confidence Interval)  | (95% Confidence Interval)  | (95% Confidence Interval)         | (95% Confidence Interval) |
| Unemployment Rate | 0.083<br>(0.076,0.091)***  | -1.3<br>(-1.4,-1.1)***     | 1.4<br>(1.3,1.5)***               | 0.93<br>(0.89,0.98)***    |
| Foreclosure Rate  | -0.0077<br>(-0.017,0.0021) | 0.028<br>(-0.13,0.19)      | -0.29<br>(-0.48,-0.11)**          | -0.22<br>(-0.33,-0.10)*** |

<sup>a</sup> Estimated using ordinary least squares regression, with individual and county fixed-effects. Models include both county-level unemployment and foreclosure and an age by race/ethnicity interaction to control for race/ethnicity-specific time trends. Beta coefficients for underweight, overweight/obesity, and obesity were multiplied by 100 and can be interpreted as a percentage point change.

<sup>b</sup> p-value for age by race/ethnicity = < 0.001.

<sup>c</sup> Underweight is defined as BMI < 5th percentile; overweight/obesity is defined as BMI ≥85th percentile; and obesity is defined as BMI ≥95th percentile using the 2000 CDC/NCHS growth charts.

\*p < 0.05 \*\*p < 0.01 \*\*\*p < 0.001

**Supplemental Table 6. Individual Fixed-Effects Regression for the Relationship Between Unemployment Rate, Foreclosure Rate, and Weight Status from 2008-2010<sup>a</sup>**

| N = 1,282,534     |                            |                            |                                   |                           |
|-------------------|----------------------------|----------------------------|-----------------------------------|---------------------------|
|                   | BMI z-score <sup>b</sup>   | Underweight <sup>b,c</sup> | Overweight/Obesity <sup>b,c</sup> | Obesity <sup>b,c</sup>    |
|                   | $\beta$                    | Percentage Point           | Percentage Point                  | Percentage Point          |
|                   | (95% Confidence Interval)  | (95% Confidence Interval)  | (95% Confidence Interval)         | (95% Confidence Interval) |
| Unemployment Rate | 0.073<br>(0.067, 0.078)*** | -1.0<br>(-1.1, -0.93)***   | 1.3<br>(1.2, 1.5)***              | 0.89<br>(0.78, 1.0)***    |
| Foreclosure Rate  | 0.0068<br>(-0.0021, 0.016) | -0.15<br>(-0.31, 0.0038)   | 0.013<br>(-0.18, 0.20)            | -0.014<br>(-0.12, 0.091)  |

<sup>a</sup> Estimated using ordinary least squares regression, with individual and county fixed-effects. Models include both county-level unemployment and foreclosure and an age by race/ethnicity interaction to control for race/ethnicity-specific time trends. Beta coefficients for underweight, overweight/obesity, and obesity were multiplied by 100 and can be interpreted as a percentage point change.

<sup>b</sup> p-value for age by race/ethnicity = < 0.001.

<sup>c</sup> Underweight is defined as BMI < 5th percentile; overweight/obesity is defined as BMI ≥85th percentile; and obesity is defined as BMI ≥95th percentile using the 2000 CDC/NCHS growth charts.

\*p < 0.05 \*\*p < 0.01 \*\*\*p < 0.001

**Supplemental Table 7. Individual Fixed-Effects Regression for the Relationship Between Unemployment Rate, Foreclosure Rate, and Overweight/Obesity when Excluding Children with Extreme Changes in BMI z-score<sup>a,b,c</sup>**

|                                | N = 1,740,584                                 |
|--------------------------------|-----------------------------------------------|
|                                | Percentage Point<br>(95% Confidence Interval) |
| Unemployment Rate <sup>d</sup> | 1.4 (1.3, 1.5)***                             |
| Foreclosure Rate <sup>d</sup>  | -0.29 (-0.48, -0.10)**                        |

<sup>a</sup> Estimated using ordinary least squares regression, with individual and county fixed-effects. Models include both county-level unemployment and foreclosure and an age by race/ethnicity interaction to control for race/ethnicity-specific time trends. Beta coefficients for were multiplied by 100 and can be interpreted as a percentage point change.

<sup>b</sup> An extreme change in BMI z-score was defined as a change in BMI z-score > 5 (n =1,128) between 2008 to 2012.

<sup>c</sup> Overweight/obesity is defined as BMI ≥85th percentile using the 2000 CDC/NCHS growth charts.

<sup>d</sup> p-value for age by race/ethnicity = < 0.001.

\*p < 0.05 \*\*p < 0.01 \*\*\*p < 0.001

**Supplemental Table 8. Mixed- and Between-Effects Regression for the Relationship Between Unemployment Rate, Foreclosure Rate, and Overweight/Obesity <sup>a,b</sup>**

|                        |  | N = 1,741,712                                 |
|------------------------|--|-----------------------------------------------|
|                        |  | Percentage Point<br>(95% Confidence Interval) |
| Mixed Effects Models   |  |                                               |
| Unemployment Rate      |  | 1.4 (1.4, 1.5)***                             |
| Foreclosure Rate       |  | -0.31(-0.41, -0.22)***                        |
| Between Effects Models |  |                                               |
| Unemployment Rate      |  | 1.8 (1.7, 1.9)***                             |
| Foreclosure Rate       |  | -0.22 (-0.30, -0.14)***                       |

<sup>a</sup> Estimated using ordinary least squares regression. Models include both county-level unemployment and foreclosure and an age by race/ethnicity interaction to control for race/ethnicity-specific time trends. Beta coefficients were multiplied by 100 and can be interpreted as a percentage point change.

<sup>b</sup> Overweight/obesity is defined as BMI  $\geq$ 85th percentile using the 2000 CDC/NCHS growth charts.

\*p < 0.05 \*\*p < 0.01 \*\*\*p < 0.001
